# Supplementary material
Source: publisher site journal article supplement (https://www.dovepress.com/get_supplementary_file.php?f=352357.docx)
Supplement: Supplementary file 1 [file get_supplementary_file.php]

**Supplementary table 1** Details of sleep questionnaire items

| **Question** | **Dimension of Sleep Assessed** | **Source(s)** | **Validity/Reliability** |
| --- | --- | --- | --- |
| **On school nights/mornings, what time did you usually go to bed and wake-up?**  On school nights, I usually went to bed at…  On school mornings, I usually woke-up at…  *Drop down bar for students to select relevant hour and minutes options (in 15 min increments) for each time point* | **Sleep Duration**  -Time between two points  **Sleep timing:**  -Bed Time  -Wake Time  -Sleep Wake pattern  (i.e. early to bed/late to rise) | Created based on previous studies methods of   - **Berentzen et al (2014)**: used self-reported original scale bed and wake time options (9 option scale from <18:30 to 22:30 for bed time; and 8 option scale from 06:00 to 08:30 for wake time), used to calculate sleep duration as well as sleep wake patterns25 - **Bartlett et al. (2012):** collected self-reported school night bed times and wake times from children46 - **Eisenmann et al (2006):** collected self-reported previous night bed times and wake times from children47 | Self-reported school day bed times and wake times found to be  significantly correlated with  actigraphy (r = 0.76, P<0.001; r=0.86, P<0.001respectively).48 |
| **At bed time (while in bed) have you…**  Found it hard to fall asleep (taken longer than 20 mins)  *Likert Scale options:*  *Never, Almost Never, Sometimes, Often, Almost Always* | **Sleep Efficiency/ Continuity**  -Sleep Initiation/latency | Created from the Children’s Sleep Habits Questionnaire, the Pittsburgh Sleep Quality Index and based on items from previous literature.   - **Pitsburg Sleep Quality Index:** “Cannot get to sleep within 30 minutes” (not during the past month, less than once a week, once-twice a week, three or more times a week)30 - **Children’s Sleep Habits Questionnaire: “**Fall asleep within 20 minutes after going to bed” (usually, sometimes, rarely)29 - **Lumeng et al (2007):** “Falls asleep in 20 mins” (yes/no)27 - **Lui et al. (2011)** “Have trouble falling asleep” (yes/no)26 - **Fernandez-Mendoza, et al. (2014): “**Have trouble falling asleep” (never, sometimes, very often)49 | **Pittsburgh Sleep Quality Index:** Evaluation found moderate to high internal reliability (α = 0.83), test–retest reliability for the global scale (0.85), a sensitivity of 89.6%, and a specificity of 86.5%.30  **Children’s Sleep Habits Questionnaire:** Demonstrated moderate to high internal consistency (0.68 to 0.78), test-retest reliability (0.62 to 0.79), sensitivity (0.80), and specificity (0.72).29 |
| **Some people wake up during the night, others never do. How often do you wake up?**  *Likert Scale options:*  *Never (I don’t wake up during the night), Almost Never (once every now and then), Sometimes (at least once), Often (3 or more times per night), I don’t know* | **Sleep Efficiency/ Continuity**  -Sleep maintenance/Wake episodes | Adapted from School Sleep Habits Survey and based on items from previous literature.  Altered ordinal response options to match previous options in our survey   - **School Sleep Habits Survey**: *Question the same (never, once,2-3 times, more than 3 time, I have no idea) 28 - **Fernandez-Mendoza, et al. (2014): “**wakes up often in the night” (never, sometimes, very often)49 - **Lui et al. (2011)** “Wakes up in the night” (yes/no)26 | The **School Sleep Habits Survey:** Had an internal consistency of .75 for the sleep/wake problem behaviours scale 28 |
| **Overall how well do you think you sleep?**  *Likert Scale options:*  *Very good, Fairly good, Average (not good but not bad). Fairly bad, very bad, I don’t know* | **Sleep Quality**  -Perceived sleep quality | Adapted from the Pittsburgh Sleep Quality Index, several School Sleep Habits Survey items and from previous literature.   - **Pittsburgh Sleep Quality Index**: “How would you rate your sleep quality overall” (very good, fairly good, fairly bad, very bad)30 - **School Sleep Habits Survey**: “How often have you felt satisfied with your sleep”; and “How often have you had a good night’s sleep” (never – every night); “Do you consider yourself to be” … (a good sleeper, a poor sleeper)28 - **ISCOLE Diet and Lifestyle Questionnaire**: “During the past week, how would you rate your sleep quality overall (how well you sleep)” (very good, fairly good, fairly bad, very bad) | **Pittsburgh Sleep Quality Index:** Evaluation found moderate to high internal reliability (α = 0.83), test–retest reliability for the global scale (0.85), a sensitivity of 89.6%, and a specificity of 86.5%. 30  The **School Sleep Habits Survey** had an internal consistency of .75 for the sleep/wake problem behaviours scale28 |

**Supplementary table 2** Descriptive characteristics and prevalence by study sample, grade and gender

|  | | **GSC** | | | | | | **GV** | | | | | | **All (GSC & GV)** | |
| --- | --- | --- | --- | --- | --- | --- | --- | --- | --- | --- | --- | --- | --- | --- | --- |
| **N** | **Grade 4** | **N** | **Grade 6** | **N** | **All** | **N** | **Grade 4** | **N** | **Grade 6** | **N** | **All** | **N** | **All** |
| **Age**  Mean (±SD) | (M) | 385 | 9.92 (±0.40) | 318 | 11.91 (±0.39) | 703 | 10.82 (±1.07) | 229 | 10.12 (±0.40) | 198 | 12.07 (±0.41) | 427 | 11.03 (±1.05) | 1130 | 10.90 (±1.7) |
| (F) | 341 | 9.84 (±0.36) | 393 | 11.82 (±0.35) | 734 | 10.90 (±1.05) | 212 | 10.05 (±0.41) | 177 | 12.04 (±0.43) | 389 | 10.96 (±1.07) | 1123 | 10.92 (±1.06) |
| **English speaking only** (%) | (M) | 381 | 94.78% | 317 | 91.48% | 698 | 93.27% | 227 | 85.46% | 194 | 85.05% | 421 | 85.27% | 1119 | 90.26% |
| (F) | 341 | 94.13% | 390 | 93.59% | 731 | 93.84% | 210 | 83.81% | 171 | 88.30% | 381 | 85.83% | 1112 | 91.10% |
| **SEIFA Quintiles** (%) | |  |  |  |  |  |  |  |  |  |  |  |  |  |  |
| Quintile 1 | (M) | 385 | 22.60% | 318 | 15.09% | 703 | 19.20% | 229 | 51.97% | 198 | 48.99% | 427 | 50.59% | 1130 | 31.06% |
| Quintile 2 | (M) | 45.45% | 52.83% | 48.79% | 16.16% | 22.22% | 18.97% | 37.52% |
| Quintile 3 | (M) | 22.34% | 18.55% | 20.63% | 3.93% | 2.53% | 3.28% | 14.07% |
| Quintile 4 | (M) | 8.57% | 11.64% | 9.96% | 27.95% | 26.26% | 27.17% | 16.46% |
| Quintile 5 | (M) | 1.04% | 1.89% | 1.42% | 0.00% | 0.00% | 0.00% | 0.88% |
|  |  |  |  |  |  |  |  |  |  |  |  |  |  |  |  |
| Quintile 1 | (F) | 341 | 18.77% | 393 | 18.83% | 734 | 18.80% | 212 | 43.40% | 177 | 48.02% | 389 | 45.50% | 1123 | 28.05% |
| Quintile 2 | (F) | 50.44% | 53.44% | 52.04% | 17.92% | 22.60% | 20.05% | 40.96% |
| Quintile 3 | (F) | 22.29% | 21.63% | 21.93% | 4.72% | 1.69% | 3.34% | 15.49% |
| Quintile 4 | (F) | 7.04% | 5.60% | 6.27% | 33.96% | 27.68% | 31.11% | 14.87% |
| Quintile 5 | (F) | 1.47% | 0.51% | 0.95% | 0.00% | 0.00% | 0.00% | 0.62% |
| **ICSEA**  Mean (±SD) | (M) | 384 | 1000.65 (±46.37) | 318 | 1006.67 (±48.24) | 702 | 1003.38 (±47.29) | 228 | 997.55 (±52.82) | 195 | 985.64 (±66.09) | 423 | 981.28 (±59.38) | 1122 | 995.07 (±53.22) |
| (F) | 341 | 1007.46 (±47.34) | 393 | 1004.25 (±46.81) | 734 | 1005.74 (±47.05) | 212 | 979.38 (±50.09) | 176 | 974.98 (±54.33) | 388 | 977.39 (±52.03) | 1122 | 995.93 (±50.64) |
| **Weight Status** | |  |  |  |  |  |  |  |  |  |  |  |  |  |  |
| BMI (WHO) Mean (±SD) | (M) | 385 | 0.64 (±1.19) | 318 | 0.60 (±1.19) | 703 | 0.63 (±1.19) | 229 | 0.71 (±1.11) | 198 | 0.64 (±1.24) | 427 | 0.68 (±1.17) | 1130 | 0.64 (±1.18) |
|  | (F) | 341 | 0.67 (±1.13) | 393 | 0.61 (±1.07) | 734 | 0.64 (±1.10) | 212 | 0.68 (±1.08) | 177 | 0.55 (±1.13) | 389 | 0.62 (±1.10) | 1123 | 0.63 (±1.10) |
|  |  |  |  |  |  |  |  |  |  |  |  |  |  |  |  |
| Overweight (%) | (M) | 385 | 17.40% | 318 | 19.81% | 703 | 18.49% | 229 | 20.96% | 198 | 21.21% | 427 | 21.08% | 1130 | 19.47% |
| Obese | (M) | 15.84% | 13.52% | 14.79% | 13.10% | 16.67% | 14.75% | 14.78% |
| Ow/Ob | (M) | 33.24% | 33.33% | 33.28% | 34.06% | 37.88% | 35.83% | 34.25% |
|  |  |  |  |  |  |  |  |  |  |  |  |  |  |  |  |
| Overweight (%) | (F) | 341 | 21.41% | 393 | 22.90% | 734 | 22.21% | 212 | 28.30% | 177 | 23.73% | 389 | 26.22% | 1123 | 23.60% |
| Obese | (F) | 14.37% | 12.47% | 13.35% | 10.38% | 11.30% | 10.80% | 12.47% |
| Ow/Ob | (F) | 35.78% | 35.37% | 35.56% | 38.68% | 35.03% | 37.02% | 36.06% |
| **Sleep Duration** | |  |  |  |  |  |  |  |  |  |  |  |  |  |  |
| Minutes Mean (±SD) | (M) | 385 | 626.84 (±64.24) | 318 | 609.48 (±55.16) | 703 | 618.99 (±60.87) | 229 | 614.15 (±71.50) | 198 | 609.24 (±56.88) | 427 | 611.87 (±65.10) | 1130 | 616.30 (±62.57) |
|  | (F) | 341 | 651.55 (±50.04) | 393 | 621.15 (±56.81) | 734 | 635.27 (±55.84) | 212 | 640.90 (±54.51) | 177 | 606.44 (±57.60) | 389 | 625.22 (±58.45) | 1123 | 631.79 (±56.93) |
|  |  |  |  |  |  |  |  |  |  |  |  |  |  |  |  |
| <9 hours (%) | (M) | 385 | 5.45% | 318 | 6.92% | 703 | 6.12% | 229 | 9.61% | 198 | 5.05% | 427 | 7.49% | 1130 | 6.64% |
| 9-11 hours | (M) | 57.40% | 73.27% | 64.58% | 57.64% | 75.25% | 65.81% | 65.04% |
| 11+ hours | (M) | 37.14% | 19.81% | 29.30% | 32.75% | 19.70% | 26.70% | 28.32% |
|  |  |  |  |  |  |  |  |  |  |  |  |  |  |  |  |
| <9 hours (%) | (F) | 341 | 0.88% | 393 | 6.62% | 734 | 3.95% | 212 | 2.83% | 177 | 8.47% | 389 | 5.40% | 1123 | 4.45% |
| 9-11 hours | (F) | 43.99% | 64.63% | 55.04% | 52.36% | 72.88% | 61.70% | 57.35% |
| 11+ hours | (F) | 55.13% | 28.75% | 41.01% | 44.81% | 18.64% | 32.90% | 38.20% |
| **Perceived sufficient duration** (%) | |  |  |  |  |  |  |  |  |  |  |  |  |  |  |
| Never/Almost Never | (M) | 347 | 24.50% | 292 | 13.70% | 639 | 19.56% | 210 | 22.86% | 181 | 14.36% | 391 | 18.93% | 1030 | 19.32% |
|  | (F) | 296 | 18.24% | 353 | 14.45% | 649 | 16.18% | 190 | 16.84% | 170 | 20.00% | 360 | 18.33% | 1009 | 16.95% |
| **Sleep-wake Timing** (%) | |  |  |  |  |  |  |  |  |  |  |  |  |  |  |
| Early To Bed / Late To Rise | (M) | 385 | 21.82% | 318 | 11.95% | 703 | 36.98% | 229 | 37.99% | 198 | 28.79% | 427 | 33.72% | 1130 | 16.99% |
| Early To Bed / Early To Rise | (M) | 18.18% | 5.66% | 21.62% | 28.38% | 19.19% | 24.12% | 12.48% |
| Late To Bed / Late To Rise | (M) | 42.60% | 60.69% | 31.15% | 21.83% | 38.89% | 29.74% | 49.38% |
| Late To Bed / Early To Rise | (M) | 17.40% | 21.70% | 10.24% | 11.79% | 13.13% | 12.41% | 21.15% |
|  |  |  |  |  |  |  |  |  |  |  |  |  |  |  |  |
| Early To Bed / Late To Rise | (F) | 341 | 40.18% | 393 | 15.01% | 734 | 47.55% | 212 | 55.19% | 177 | 28.81% | 389 | 43.19% | 1123 | 24.49% |
| Early To Bed / Early To Rise | (F) | 13.78% | 5.60% | 16.76% | 20.28% | 18.08% | 19.28% | 10.24% |
| Late To Bed / Late To Rise | (F) | 33.72% | 61.32% | 27.66% | 20.28% | 41.81% | 30.08% | 50.04% |
| Late To Bed / Early To Rise | (F) | 12.32% | 18.07% | 8.04% | 4.25% | 11.30% | 7.46% | 15.23% |
| **Perceived Quality** | |  |  |  |  |  |  |  |  |  |  |  |  |  |  |
| Bad/Very Bad (%) | (M) | 383 | 6.79% | 317 | 7.26% | 700 | 7.00% | 229 | 12.66% | 197 | 6.60% | 426 | 9.86% | 1126 | 8.08 |
|  | (F) | 335 | 7.10% | 392 | 8.67% | 727 | 7.84% | 210 | 10.00% | 177 | 7.91% | 387 | 9.04% | 1114 | 8.26 |
| **Sleep Efficiency** | |  |  |  |  |  |  |  |  |  |  |  |  |  |  |
| Sleep initiation problem (%) | (M) | 379 | 29.55% | 316 | 28.48% | 694 | 29.06% | 221 | 28.05% | 195 | 29.23% | 416 | 28.61% | 1111 | 28.89% |
|  | (F) | 336 | 26.19% | 389 | 30.59% | 725 | 28.55% | 209 | 32.06% | 175 | 28.57% | 384 | 30.47% | 1109 | 29.22% |
|  |  |  |  |  |  |  |  |  |  |  |  |  |  |  |  |
| ≥3 wake periods per night (%) | (M) | 361 | 9.14% | 309 | 9.39% | 670 | 9.25% | 227 | 9.69% | 197 | 7.11% | 424 | 8.49% | 1072 | 9.14% |
|  | (F) | 307 | 6.84% | 376 | 6.91% | 683 | 6.88% | 211 | 9.00% | 176 | 6.25% | 387 | 7.75% | 1049 | 7.34% |
| **Total number of dimensions scored as poor** | |  |  |  |  |  |  |  |  |  |  |  |  |  |  |
| No recorded problems (%) | (M) | 385 | 14.03% | 318 | 7.86% | 703 | 11.24% | 229 | 15.28% | 198 | 6.57% | 427 | 11.24% | 1130 | 11.24% |
| One dimension | (M) | 45.97% | 49.37% | 47.51% | 37.12% | 48.99% | 42.62% | 45.66% |
| Two dimensions | (M) | 26.75% | 25.47% | 26.17% | 26.20% | 29.29% | 27.63% | 26.73% |
| Three dimensions | (M) | 8.83% | 9.43% | 9.10% | 14.41% | 9.09% | 11.94% | 10.18% |
| Four or more dimensions | (M) | 4.42% | 7.86% | 5.97% | 6.99% | 6.06% | 6.56% | 6.19% |
|  |  |  |  |  |  |  |  |  |  |  |  |  |  |  |  |
| No recorded problems (%) | (F) | 341 | 25.51% | 393 | 11.45% | 734 | 17.98% | 212 | 17.92% | 177 | 8.47% | 389 | 13.62% | 1123 | 16.47% |
| One dimension | (F) | 46.92% | 45.29% | 46.05% | 47.64% | 46.89% | 47.30% | 46.48% |
| Two dimensions | (F) | 19.65% | 25.70% | 22.89% | 19.34% | 31.07% | 24.68% | 23.51% |
| Three dimensions | (F) | 6.45% | 12.72% | 9.81% | 11.32% | 6.21% | 9.00% | 9.53% |
| Four or more dimensions | (F) | 1.47% | 4.83% | 3.27% | 3.77% | 7.34% | 5.40% | 4.01% |

**Abbreviations:** GSC, Great South Coast sample; GV, Goulburn Valley sample; BMIz, body mass index z-scores (age and sex adjusted); SD, standard deviation; M, males; F, females; ICSEA, Index of Community Socio-Educational Advantage; SEIFA, Socio-Economic Indexes for Areas; SEIFA Quintiles, low(1)-high(5); Ow/Ob, overweight or obese.
